# Supplementary material
Source: PubMed Central journal article supplement (PMC9479122)

## Supplemental Table and figure legends

**Table S1 – Patient clinical information, Related to Figures 2, 4, 5, 6**

**Table S2 – Single-cell RNA sequencing cluster assignment, Related to Figure 2 (Excel file)**

**Table S3 – HLA class I genotype of bladder cancer patients, Related to Figure 2**

**Table S4 – Mass Cytometry panels, Related to Figures 3, 4, 6**

**Table S5 – RNA velocity analysis, Related to Figure 5 (Excel file)**

**Figure S1. Improved overall survival in NKG2A<sup>+</sup> (*KLRC1*<sup>high</sup>) CD8 T cell-infiltrated bladder tumors, Related to Figure 1**

Immunofluorescence staining of *KLRC1*<sup>high</sup> and *KLRC1*<sup>low</sup> bladder tumors.

(A) Representative staining of *KLRC1*<sup>high</sup> bladder tumors (n=1). Green: NKG2A, Red: NKp46, Blue: DAPI

(B) Representative staining of *KLRC1*<sup>low</sup> bladder tumors (n=1). Green: NKG2A, Red: NKp46, Blue: DAPI, White: CD3

(C) Summary graph of NKG2A expression in CD8 T cells from *KLRC1*<sup>high</sup> (n=6) and *KLRC1*<sup>low</sup> (n=4) bladder tumors. Error bars represent the SEM.

**Figure S2. Bladder tumor cell-surface expression of HLA class I and ligands for PD-1 and activating NK cell receptors, Related to Figure 2.**

(A) Representative staining for HLA-ABC, HLA-E and the tumor marker EpCAM by immunohistochemistry, alongside Halo AI™-derived classification and segmentation of bladder tumor cells (n=1).

(B) Differentially expressed genes in CD8 T cells from *HLA-E*<sup>high</sup> (n=1973 cells from 4 donors) versus *HLA-E*<sup>low</sup> (n=869 cells from 3 donors) bladder tumors.

(C) The expression of HLA class I and ligands for PD-1 (PD-L1/L2), DNAM-1 (CD112, CD115), NKG2D (ULBPs, MICA/B), NKp30 (“NKp30-L”), NKp44 (“NKp44-L”), NKp46 (“NKp46-L”) was assessed by flow cytometry on n=11 bladder cancer lines from histological grade 1 to 3 as well as on the control cell line K562 (n=1 replicate). Grey: unstained control. Red: stained cells.

**Figure S3. NKG2A-expressing CD8 T cells are differentiated and possess TCR-independent NK-like functions in healthy individuals, Related to Figure 3**

(A-D) Mass cytometry was performed *ex vivo* on HD PBMCs (n=20).

(A) CMV and gender effect on NKG2A expression on CD8 T cells from HD PBMCs depending on differentiation stage.

(B) Correlation between age and NKG2A expression on CD8 T cells depending on differentiation stage.

(C) Correlation between HLA-E expression on lymphocytes and NKG2A expression on CD8 T cells depending on their differentiation stage.

(D) NKp30, NKp46, NKG2D and DNAM-1 expression on NKG2A<sup>±</sup> CD8 T cells depending on their differentiation stage.

(E) Representative NKG2A and CD28 staining on CD8 T cells (n=1).

(F-H) CD8 T cells were isolated from HD PBMCs and recovered overnight with IL-12, IL-15, IL-18 10ng/mL prior to a 5h co-culture with K562 in the presence of brefeldin and monensin (n=20)

(F) Degranulation, production of IFN- $\gamma$ , TNF- $\alpha$ , XCL1, IL-2 and cytolytic content of CD8 T cells upon K562 stimulation.

(G) Amount of functional markers acquired or released upon K562 stimulation in CD8 T cells and NK cells.

(H) Effect of CD8 T cell NKG2A expression, lymphocyte HLA-E expression, age, gender and combined effect of NKG2A with HLA-E on the upregulation of functional markers upon K562 stimulation.

(I-J) CD8 T cells were isolated from HD PBMCs and recovered overnight with IL-12, IL-15, IL-18 10ng/mL prior to a 5h co-culture with K562 in the presence of brefeldin and monensin in the presence or absence of anti-DNAM-1 blocking antibody (n=10).

(I) Correlation between NKG2A or CD28 expression within each cluster and Log<sub>2</sub>(Fold change) of the expression of XCL1 upon K562 stimulation.

(J) Log<sub>2</sub>(Fold change) of IFN- $\gamma$  and TNF- $\alpha$  expression upon anti-DNAM-1 blocking antibody addition, versus isotype control, in all clusters.

Pearson correlation was used in (B), (C), (I), paired t-tests in (F), linear models in (H) and unpaired t-tests in (I), (J). All statistical tests were adjusted for multiple comparison. Only the significant comparisons are displayed in (H). (A), (D), (F), (G): Error bars represent the SEM. “ns” p>0.05, \* p<0.05, \*\* p<0.01, \*\*\* p<0.001, \*\*\*\* p<0.0001.

**Figure S4. NKG2A defines a subset of PD-1<sup>+</sup> TRM CD8<sup>+</sup> T cells that retain TCR-independent functions in bladder tumors, Related to Figure 4**

(A-D) Mass cytometry was performed on *ex vivo* bladder tumor-draining lymph nodes, tumor and adjacent tissue from bladder cancer patients.

(A) Summary *ex vivo* expression of cytotoxic mediators on CD8 T cells from bladder tumor-draining lymph



nodes (n=5), tumor (n=7) and adjacent tissue (n=6). Lines show matching samples from a unique donor.  
(B) CD8 T cell phenotype in bladder tumor-draining lymph nodes that are tumor-infiltrated (“TILN”, n=2) or not tumor-infiltrated (“non-TILN”, n=3).  
(C) Association between normalized mean signal intensity of key markers on CD8 T cells with pseudotime (n=7).  
(D) Phenotype of PD1<sup>+</sup> NKG2A<sup>-</sup> and PD1<sup>+</sup> NKG2A<sup>+</sup> CD8 T cells in the tumors (n=6). Only the nonsignificant markers are displayed.  
Paired t-tests were used in (A), (D).

**Figure S5. *KLRC1* (NKG2A) expression in CD8 T cells does not associate with a skewed TCR clonal repertoire, Related to Figure 4**

(A-D) *KLRC1*<sup>low/high</sup> CD8 T cell clonality was determined by analyzing publicly available scRNAseq and TCRseq data from bladder tumors (n=7) or non-involved adjacent tissue (n=2) (Oh *et al.*, 2020).  
(A) Frequency of TCRs present in 1, 2 or at least 3 cells per sample, depending on *KLRC1* expression.  
(B) Summary data in tumor and non-involved adjacent tissue. Error bars represent the SEM.  
(C) Frequency of TCRs present in 1 cell depending on *KLRC1* expression.  
(D) Number of TCRs present in at least 2 cells that are unique or common to *KLRC1*<sup>low</sup> and *KLRC1*<sup>high</sup> cells per sample. Only samples with at least 2 TCRs present in at least 2 *KLRC1*<sup>high</sup> cells were selected.

**Figure S6. TCR-independent function is acquired by CD8 T cells upon NKG2A acquisition and is enhanced with NKG2A blockade in bladder cancer, Related to Figure 6**

(A-F) CD8 T cells were isolated from bladder tumor-draining lymph nodes and expanded for 8-13 days with IL-2, IL-7, IL-15 and CD3/CD28 tetramer. CD49a<sup>-</sup> NKG2A<sup>-</sup> PD1<sup>-</sup> (n=5), CD49a<sup>+</sup> NKG2A<sup>-</sup> PD1<sup>-</sup> (n=6), CD49a<sup>+/-</sup> NKG2A<sup>-</sup> PD1<sup>+</sup> (n=6) and CD49a<sup>+/-</sup> NKG2A<sup>+</sup> PD1<sup>-</sup> (n=5) cells were then FACS-sorted and expanded during 3 days with IL-2, IL-7, IL-15 and CD3/CD28 tetramer with or without TGF- $\beta$  prior to coculture with K562. Mass cytometry was performed at all timepoints.  
(A) Representative staining of NKG2A/PD1 expression on FACS-sorted cells upon 3-day expansion (n=1 patient).  
(B) Summary data of NKG2A/PD1 expression on FACS-sorted cells upon 3-day expansion.  
(C) Upregulation of functional markers upon K562 co-culture of CD8 T cells that have been FACS-sorted as CD49a<sup>-</sup> or CD49a<sup>+</sup> NKG2A<sup>-</sup> PD1<sup>-</sup> CD8 T cells and expanded during 3 days with TGF- $\beta$ .  
(D) Expression of markers associated with tissue-residency, exhaustion and NK/CD8T cell function on CD49a<sup>+/-</sup> NKG2A<sup>-</sup> PD1<sup>-</sup> CD8 T cells before and after 3-day expansion with or without TGF- $\beta$ .  
(E) Expression of markers associated with tissue-residency, exhaustion and NK/CD8T cell function alongside NKG2A and PD-1 acquisition upon 3-day expansion of NKG2A<sup>-</sup> PD1<sup>-</sup> CD8 T cells with TGF- $\beta$ .  
(F) Expression of functional markers alongside NKG2A and PD-1 acquisition upon 3-day expansion of NKG2A<sup>-</sup> PD1<sup>-</sup> CD8 T cells with TGF- $\beta$  and 5h co-culture with K562.  
(G-H) CD8 T cells were isolated from bladder tumors (n=6) and expanded for 11-17 days with IL-2, IL-7, IL-15 and CD3/CD28 tetramer, prior to 5h co-culture with Wild-type (WT) or HLA-E<sup>+</sup> K562.  
(G) Degranulation of NKG2A<sup>+</sup> CD8 T cells upon co-culture with WT K562 in the presence or absence of monalizumab.  
(H) Production of IFN- $\gamma$ , TNF- $\alpha$ , XCL1 and IL-2 by NKG2A<sup>+</sup> CD8 T cells upon co-culture with HLA-E<sup>+</sup> K562 in the presence or absence of monalizumab.  
Paired t-tests were used in (B)-(H). P-values were corrected for multiple comparisons in (B), (D), (E), (F). (B), (G), (H): Error bars represent the SEM. “ns” p>0.05, \* p<0.05, \*\* p<0.01, \*\*\* p<0.001, \*\*\*\* p<0.0001.

Figure S1 Improved overall survival in NKG2A<sup>+</sup> (*KLRC1*<sup>high</sup>) CD8 T cell-infiltrated bladder tumors,  
Related to Figure 1

A

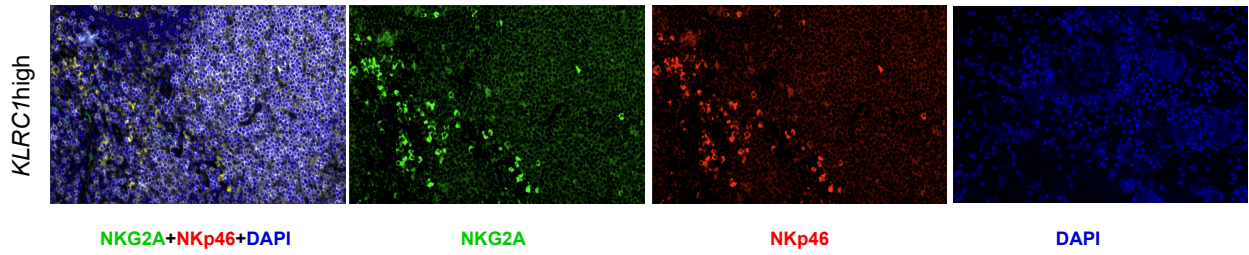

B

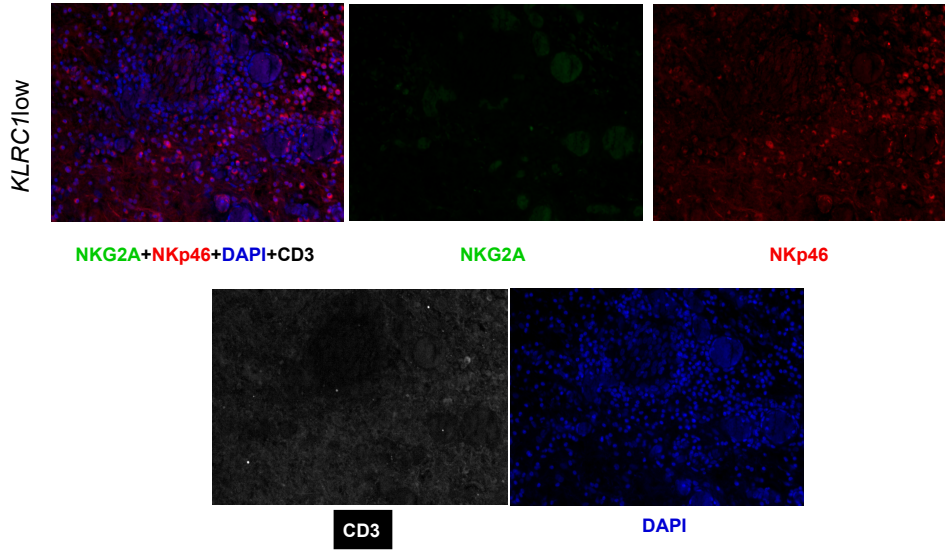

C

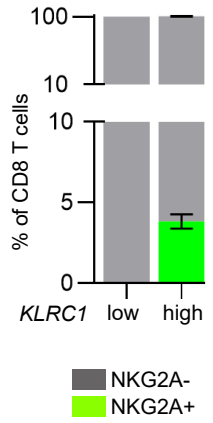

Table S1 Patient Clinical Information, Related to Figures 2, 4, 5, 6

| ID | scRNAseq - bulk | Genotyped | Flow tumor | ex vivo CyTOF | scRNAseq - CD8T | TGF | Monalizumab | HTG / IF | IHC | NMI / MI | Pathology T stage | Pathology N stage | Surgery    | Treatment history                               | Age | Sex | Note                    | Isolation (scRNAseq) |
|----|-----------------|-----------|------------|---------------|-----------------|-----|-------------|----------|-----|----------|-------------------|-------------------|------------|-------------------------------------------------|-----|-----|-------------------------|----------------------|
| 1  |                 |           |            |               |                 |     |             |          |     | NMI      | pT1               | Nx                | TURBT      | BCG                                             | 85  | M   | Prostate cancer history | CD45+/- FACS         |
| 2  |                 |           |            |               |                 |     |             |          |     | MI       | pT3               | N3                | cystectomy | BCG, Gemcitabin/ Cisplatin/ Nivolumab           | 67  | M   |                         | CD45+/- FACS         |
| 3  |                 |           |            |               |                 |     |             |          |     | MI       | pT4               | N0                | cystectomy | Gemcitabin/ Cisplatin                           | 68  | M   |                         | none                 |
| 4  |                 |           |            |               |                 |     |             |          |     | NMI      | pT1               | N0                | cystectomy | Gemcitabin/ Cisplatin/ Nivolumab                | 73  | M   |                         | none                 |
| 5  |                 |           |            |               |                 |     |             |          |     | MI       | pT3b              | N2                | cystectomy | Gemcitabin/ Cisplatin/ Nivolumab                | 46  | F   |                         | none                 |
| 6  |                 |           |            |               |                 |     |             |          |     | MI       | pT3b              | N2                | cystectomy | none                                            | 71  | M   |                         | none                 |
| 7  |                 |           |            |               |                 |     |             |          |     | NMI      | pT0               | N0                | cystectomy | Gemcitabin/ Cisplatin/ Nivolumab                | 52  | F   |                         | none                 |
| 8  |                 |           |            |               |                 |     |             |          |     | MI       | pT2               | N0                | TURBT      | none                                            | 60  | M   |                         | none                 |
| 9  |                 |           |            |               |                 |     |             |          |     | NMI      | pT1               | N0                | cystectomy | none                                            | 65  | M   |                         | N/A                  |
| 10 |                 |           |            |               |                 |     |             |          |     | NMI      | pT1               | N0                | cystectomy | BCG                                             | 85  | M   |                         | N/A                  |
| 11 |                 |           |            |               |                 |     |             |          |     | MI       | pT4a              | N2                | cystectomy | none                                            | 76  | F   |                         | N/A                  |
| 12 |                 |           |            |               |                 |     |             |          |     | MI       | pT2+              | Nx                | TURBT      | none                                            | 56  | M   |                         | N/A                  |
| 13 |                 |           |            |               |                 |     |             |          |     | NMI      | pTa               | Nx                | TURBT      | intravesical chemotherapy                       | 62  | M   |                         | N/A                  |
| 14 |                 |           |            |               |                 |     |             |          |     | NMI      | pT1               | Nx                | TURBT      | BCG                                             | 61  | M   |                         | N/A                  |
| 15 |                 |           |            |               |                 |     |             |          |     | NMI      | pT1               | N0                | cystectomy | BCG, radiation, chemotherapy                    | 82  | M   |                         | N/A                  |
| 16 |                 |           |            |               |                 |     |             |          |     | NMI      | pT1               | Nx                | cystectomy | none                                            | 71  | M   |                         | N/A                  |
| 17 |                 |           |            |               |                 |     |             |          |     | NMI      | pTis              | Nx                | TURBT      | none                                            | 74  | M   |                         | N/A                  |
| 18 |                 |           |            |               |                 |     |             |          |     | MI       | pT4a              | N2                | cystectomy | BCG, Gemcitabin/Cisplatin                       | 61  | M   |                         | N/A                  |
| 19 |                 |           |            |               |                 |     |             |          |     | MI       | pT2a              | N0                | cystectomy | Gemcitabin/Cisplatin                            | 69  | M   |                         | N/A                  |
| 20 |                 |           |            |               |                 |     |             |          |     | MI       | pT3a              | N0                | cystectomy | none                                            | 73  | M   | HIV+                    | N/A                  |
| 21 |                 |           |            |               |                 |     |             |          |     | NMI      | pTis              | N2                | cystectomy | Methotrexate/Vinblastine/ Doxorubicin/Cisplatin | 75  | F   |                         | N/A                  |
| 22 |                 |           |            |               |                 |     |             |          |     | NMI      | pTa               | Nx                | TURBT      | none                                            | 84  | F   |                         | N/A                  |
| 23 |                 |           |            |               |                 |     |             |          |     | NMI      | pTa               | Nx                | TURBT      | Gemcitabin                                      | 80  | M   |                         | N/A                  |
| 24 |                 |           |            |               |                 |     |             |          |     | MI       | pT3a              | N1                | cystectomy | none                                            | 67  | F   |                         | N/A                  |
| 25 |                 |           |            |               |                 |     |             |          |     | NMI      | pTa               | Nx                | TURBT      | none                                            | 67  | M   |                         | N/A                  |
| 26 |                 |           |            |               |                 |     |             |          |     | MI       | pT2a              | N0                | cystectomy | none                                            | 74  | M   |                         | N/A                  |
| 27 |                 |           |            |               |                 |     |             |          |     | NMI      | pT1               | Nx                | TURBT      | none                                            | 81  | M   |                         | N/A                  |
| 28 |                 |           |            |               |                 |     |             |          |     | MI       | pT3a              | N0                | cystectomy | none                                            | 73  | M   |                         | N/A                  |
| 29 |                 |           |            |               |                 |     |             |          |     | MI       | pTis              | N2                | cystectomy | chemotherapy                                    | 75  | F   |                         | N/A                  |
| 30 |                 |           |            |               |                 |     |             |          |     | MI       | pT0               | N0                | cystectomy | Gemcitabin/ Cisplatin/ Nivolumab                | 57  | M   |                         | N/A                  |
| 31 |                 |           |            |               |                 |     |             |          |     | NMI      | pTa               | Nx                | TURBT      | none                                            | 84  | F   |                         | N/A                  |
| 32 |                 |           |            |               |                 |     |             |          |     | NMI      | pTa               | Nx                | TURBT      | Gemcitabin                                      | 81  | M   |                         | N/A                  |
| 33 |                 |           |            |               |                 |     |             |          |     | MI       | pT3b              | N1                | cystectomy | none                                            | 73  | M   |                         | N/A                  |
| 34 |                 |           |            |               |                 |     |             |          |     | NMI      | pTa               | Nx                | TURBT      | none                                            | 76  | M   |                         | N/A                  |
| 35 |                 |           |            |               |                 |     |             |          |     | NMI      | pT0               | Nx                | cystectomy | none                                            | 50  | F   |                         | N/A                  |
| 36 |                 |           |            |               |                 |     |             |          |     | MI       | pT3b              | N2                | cystectomy | none                                            | 71  | M   |                         | N/A                  |
| 37 |                 |           |            |               |                 |     |             |          |     | MI       | pT3a              | N0                | cystectomy | none                                            | 87  | M   |                         | N/A                  |
| 38 |                 |           |            |               |                 |     |             |          |     | MI       | pT3a              | N0                | cystectomy | none                                            | 76  | M   |                         | N/A                  |
| 39 |                 |           |            |               |                 |     |             |          |     | NMI      | pT1               | Nx                | TURBT      | none                                            | 48  | M   |                         | N/A                  |
| 40 |                 |           |            |               |                 |     |             |          |     | MI       | pT3               | N0                | cystectomy | none                                            | 54  | M   |                         | N/A                  |
| 41 |                 |           |            |               |                 |     |             |          |     | MI       | pTis              | N2                | cystectomy | none                                            | 64  | M   |                         | N/A                  |
| 42 |                 |           |            |               |                 |     |             |          |     | MI       | pT2a              | N0                | cystectomy | none                                            | 84  | M   | Prostate cancer history | N/A                  |
| 43 |                 |           |            |               |                 |     |             |          |     | MI       | pT4a              | N0                | cystectomy | none                                            | 65  | M   |                         | N/A                  |
| 44 |                 |           |            |               |                 |     |             |          |     | NMI      | pTa               | N0                | cystectomy | BCG                                             | 65  | M   |                         | N/A                  |
| 45 |                 |           |            |               |                 |     |             |          |     | MI       | pT3+              | Nx                | TURBT      | BCG                                             | 78  | M   | Prostate cancer history | N/A                  |
| 46 |                 |           |            |               |                 |     |             |          |     | MI       | pT3a              | N2                | cystectomy | none                                            | 75  | F   |                         | N/A                  |
| 47 |                 |           |            |               |                 |     |             |          |     | MI       | pT2a              | N0                | cystectomy | none                                            | 51  | M   |                         | N/A                  |
| 48 |                 |           |            |               |                 |     |             |          |     | MI       | pT3b              | Nx                | cystectomy | none                                            | 66  | F   |                         | N/A                  |

|    |  |  |  |  |  |  |  |  |     |         |    |                          |                                                  |                                |   |                                               |            |
|----|--|--|--|--|--|--|--|--|-----|---------|----|--------------------------|--------------------------------------------------|--------------------------------|---|-----------------------------------------------|------------|
| 49 |  |  |  |  |  |  |  |  | MI  | pT2     | Nx | TURBT                    | none                                             | 59                             | M | HIV+, not detectable;<br>Renal cancer history | CD45+ FACS |
| 50 |  |  |  |  |  |  |  |  | NMI | pT0     | Nx | TURBT                    | unknown                                          | 73                             | M |                                               | CD45+ FACS |
| 51 |  |  |  |  |  |  |  |  | MI  | pT2     | Nx | TURBT                    | none                                             | 66                             | M |                                               | CD45+ FACS |
| 52 |  |  |  |  |  |  |  |  | NMI | pTa     | Nx | TURBT                    | none                                             | 82                             | F |                                               | CD45+ FACS |
| 53 |  |  |  |  |  |  |  |  | MI  | pT1     | Nx | TURBT                    | ipilimumab/nivolumab                             | 67                             | M |                                               | CD45+ FACS |
| 54 |  |  |  |  |  |  |  |  | MI  | pT3b    | N0 | cystectomy               | BCG                                              | 82                             | M |                                               | CD45+ FACS |
| 55 |  |  |  |  |  |  |  |  | MI  | pT3     | N0 | TURBT                    | none                                             | 85                             | F | Uterine cancer history                        | none       |
| 56 |  |  |  |  |  |  |  |  | NMI | pTis    | N0 | cystectomy               | BCG, intravesical<br>chemotherapy                | 88                             | M |                                               | N/A        |
| 57 |  |  |  |  |  |  |  |  | NMI | pT0     | N0 | cystectomy               | BCG                                              | 58                             | M | Concomittant prostate<br>cancer               | N/A        |
| 58 |  |  |  |  |  |  |  |  | MI  | pT3a    | N1 | cystectomy               | BCG                                              | 71                             | M |                                               | N/A        |
| 59 |  |  |  |  |  |  |  |  | NMI | pT1     | N0 | TURBT                    | none                                             | 60                             | M |                                               | N/A        |
| 60 |  |  |  |  |  |  |  |  | NMI | pTis    | N0 | TURBT                    | none                                             | 89                             | M |                                               | N/A        |
| 61 |  |  |  |  |  |  |  |  | NMI | pT1     | N0 | TURBT                    | none                                             | 86                             | M |                                               | N/A        |
| 62 |  |  |  |  |  |  |  |  | NMI | pTa     | N0 | TURBT                    | BCG                                              | 61                             | M |                                               | N/A        |
| 63 |  |  |  |  |  |  |  |  | NMI | pT1     | N0 | TURBT                    | BCG/interferon                                   | 64                             | M |                                               | N/A        |
| 64 |  |  |  |  |  |  |  |  | NMI | pT1     | N0 | TURBT                    | BCG                                              | 54                             | M |                                               | N/A        |
| 65 |  |  |  |  |  |  |  |  | NMI | pT1     | N0 | TURBT                    | BCG                                              | 84                             | M |                                               | N/A        |
| 66 |  |  |  |  |  |  |  |  | NMI | pTa     | N0 | TURBT                    | none                                             | 60                             | M |                                               | N/A        |
| 67 |  |  |  |  |  |  |  |  | NMI | pT1     | N0 | TURBT                    | BCG                                              | 71                             | M |                                               | N/A        |
| 68 |  |  |  |  |  |  |  |  | NMI | pTis/Ta | N0 | TURBT                    | BCG, Mitomycin                                   | 81                             | F |                                               | N/A        |
| 69 |  |  |  |  |  |  |  |  | NMI | pTis/Ta | N0 | TURBT                    | none                                             | 66                             | M |                                               | N/A        |
| 70 |  |  |  |  |  |  |  |  | NMI | pT1     | N0 | TURBT                    | none                                             | 75                             | M |                                               | N/A        |
| 71 |  |  |  |  |  |  |  |  | NMI | pT1     | N0 | TURBT                    | none                                             | 50                             | M |                                               | N/A        |
| 72 |  |  |  |  |  |  |  |  | NMI | pTis/Ta | N0 | TURBT                    | none                                             | 74                             | M |                                               | N/A        |
| 73 |  |  |  |  |  |  |  |  | NMI | pT1     | N0 | TURBT                    | BCG                                              | 84                             | M |                                               | N/A        |
| 74 |  |  |  |  |  |  |  |  | NMI | pT2     | N0 | cystectomy               | BCG                                              | 61                             | M |                                               | N/A        |
| 75 |  |  |  |  |  |  |  |  | NMI | pT2     | N0 | TURBT                    | BCG, anti-PD-1                                   | 66                             | M |                                               | N/A        |
| 76 |  |  |  |  |  |  |  |  | NMI | pTis/T1 | N0 | cystectomy               | BCG                                              | 76                             | M |                                               | N/A        |
| 77 |  |  |  |  |  |  |  |  | NMI | pT1     | N0 | TURBT                    | BCG                                              | 50                             | M |                                               | N/A        |
| 78 |  |  |  |  |  |  |  |  | NMI | pTis/Ta | N0 | TURBT                    | BCG                                              | 75                             | M |                                               | N/A        |
| 79 |  |  |  |  |  |  |  |  | MI  | pT2a    | N3 | cystectomy               | platinum-based<br>chemotherapy,<br>pembrolizumab | 75                             | M |                                               | N/A        |
| 80 |  |  |  |  |  |  |  |  | MI  | pT3a    | N0 | cystectomy               |                                                  | 61                             | M |                                               | N/A        |
| 81 |  |  |  |  |  |  |  |  | MI  | pTa     | N0 | TURBT                    |                                                  | 75                             | M |                                               | N/A        |
| 82 |  |  |  |  |  |  |  |  | MI  | pT3     | N2 | Resection                |                                                  | 64                             | F |                                               | N/A        |
| 83 |  |  |  |  |  |  |  |  | MI  | ?       | ?  | Resection                |                                                  | 42                             | F |                                               | N/A        |
| 84 |  |  |  |  |  |  |  |  | MI  | ?       | ?  | TURBT                    |                                                  | ?                              | M |                                               | N/A        |
| 85 |  |  |  |  |  |  |  |  | MI  | pT3b    | N3 | cystectomy               |                                                  | 86                             | M |                                               | N/A        |
| 86 |  |  |  |  |  |  |  |  | MI  | pT4b    | N0 | Anterior<br>exenteration |                                                  | ?                              | F |                                               | N/A        |
| 87 |  |  |  |  |  |  |  |  | MI  | ?       | ?  | TURBT                    |                                                  | 47                             | F |                                               | N/A        |
| 88 |  |  |  |  |  |  |  |  | MI  | ?       | ?  | Ureteral<br>biopsy       |                                                  | platinum-based<br>chemotherapy | ? | M                                             |            |
| 89 |  |  |  |  |  |  |  |  | MI  | pT2     | N0 | cystectomy               | none                                             | 53                             | M |                                               | N/A        |



Table S3 HLA class I genotype of bladder cancer patients, Related to Figure 2

| <b>ID</b> | <b>HLA-A_1</b> | <b>HLA-A_2</b> | <b>HLA-B_1</b> | <b>HLA-B_2</b> | <b>HLA-C_1</b> | <b>HLA-C_2</b> |
|-----------|----------------|----------------|----------------|----------------|----------------|----------------|
| #9        | 24:02          | 25:01          | 41:01          | 51:01          | 15:02          | 17:01          |
| #10       | 02:01          | 02:01          | 38:01          | 48:01          | 08:03          | 12:03          |
| #11       | 02:01          | 31:01          | 35:02          | 52:01          | 04:01          | 12:02          |
| #12       | 23:01          | 26:01          | 35:01          | 53:01          | 04:01          | 06:02          |
| #13       | 11:01          | 24:20          | 35:03          | 48:01          | 04:01          | 08:03          |
| #14       | 01:01          | 23:01          | 53:01          | 81:01          | 04:01          | 18:01          |
| #15       | 02:01          | 32:01          | 15:71          | 18:01          | 03:03          | 07:01          |
| #16       | 02:01          | 02:05          | 35:01          | 58:01          | 04:01          | 07:01          |
| #17       | 01:01          | 26:01          | 35:02          | 38:01          | 06:02          | 12:03          |
| #18       | 11:01          | 24:02          | 13:02          | 52:01          | 06:02          | 12:02          |
| #19       | 02:01          | 02:11          | 35:01          | 49:01          | 04:01          | 07:01          |
| #20       | 02:01          | 23:01          | 42:01          | 44:03          | 04:01          | 17:01          |
| #21       | 23:01          | 26:01          | 35:01          | 53:01          | 04:01          | 06:02          |
| #22       | 01:01          | 02:05          | 35:02          | 41:01          | 04:01          | 07:01          |
| #23       | 02:10          | 11:02          | 40:06          | 55:02          | 01:02          | 08:01          |
| #24       | 02:05          | 23:01          | 44:03          | 49:01          | 04:01          | 07:01          |

Table S4 Mass Cytometry panels, Related to Figures 3, 4, 6

|        | Panel 1                   | Panel 2       | Panel 3 | Panel 4 |
|--------|---------------------------|---------------|---------|---------|
| 89 Y   | CD45                      |               |         |         |
| 111Cd  | HLA-DR                    |               |         |         |
| 112Cd  | Granzyme A                |               |         |         |
| 113Cd  | CD38                      |               |         |         |
| 114Cd  | $\gamma\delta$ TCR        |               |         |         |
| 115 In | KLRG1, CRTH2              | IFN- $\gamma$ |         |         |
| 116Cd  | CD57                      |               |         |         |
| 141 Pr |                           | Ksp37         |         | SLAMF6  |
| 142Nd  | CD4, CD14, CD19, Va24 TCR |               |         |         |
| 143 Nd | CD45RA                    |               |         |         |
| 144 Nd | CD122                     | CD69          | CD122   | CD69    |
| 145 Nd | NKG2D                     |               |         |         |
| 146 Nd | CD8                       |               |         |         |
| 147 Sm | NKp80                     | CD107a        |         |         |
| 148 Nd | CCR7                      |               |         |         |
| 149 Sm | CTLA-4                    |               |         |         |
| 150 Nd | ROR- $\gamma$ t           | IL-2          |         |         |
| 151 Eu | TCF-1                     |               |         |         |
| 152 Sm | CD25                      | TNF- $\alpha$ |         |         |
| 153 Eu | PD1                       |               |         |         |
| 154 Sm | CXCR5                     |               |         |         |
| 155 Gd | NKp46                     |               |         |         |
| 156 Gd | Tim-3                     |               |         |         |
| 158 Gd | KIR2DL1                   |               |         | CD49a   |
| 159 Tb | CD56                      |               |         |         |
| 160 Gd | CD39                      |               |         |         |
| 161 Dy | NKG2A                     |               |         |         |
| 162 Dy | NKG2C                     |               |         |         |
| 163 Dy | EOMES                     |               |         |         |
| 164 Dy | CD28                      |               |         |         |
| 165 Ho | NKp30                     |               |         |         |
| 166 Er | Fas-L                     | IgG4          | Fas-L   | IgG4    |
| 167 Er | KIR2DL2/L3                |               |         | CD103   |
| 168 Er | TRAIL                     |               |         | KI67    |
| 169 Tm | Tbet                      |               |         |         |
| 170 Er | CD3                       |               |         |         |
| 171 Yb |                           | XCL1          |         |         |
| 172 Yb | Perforin                  |               |         |         |
| 173 Yb | Granzyme B                |               |         |         |
| 174 Yb | TOX                       |               |         |         |
| 175 Lu | TIGIT                     |               |         |         |
| 176 Yb | DNAM1                     |               |         |         |
| 209 Bi | CD16                      |               |         |         |

Figure S3. NKG2A-expressing CD8 T cells are differentiated and possess TCR-independent NK-like functions in healthy individuals, Related to Figure 3.

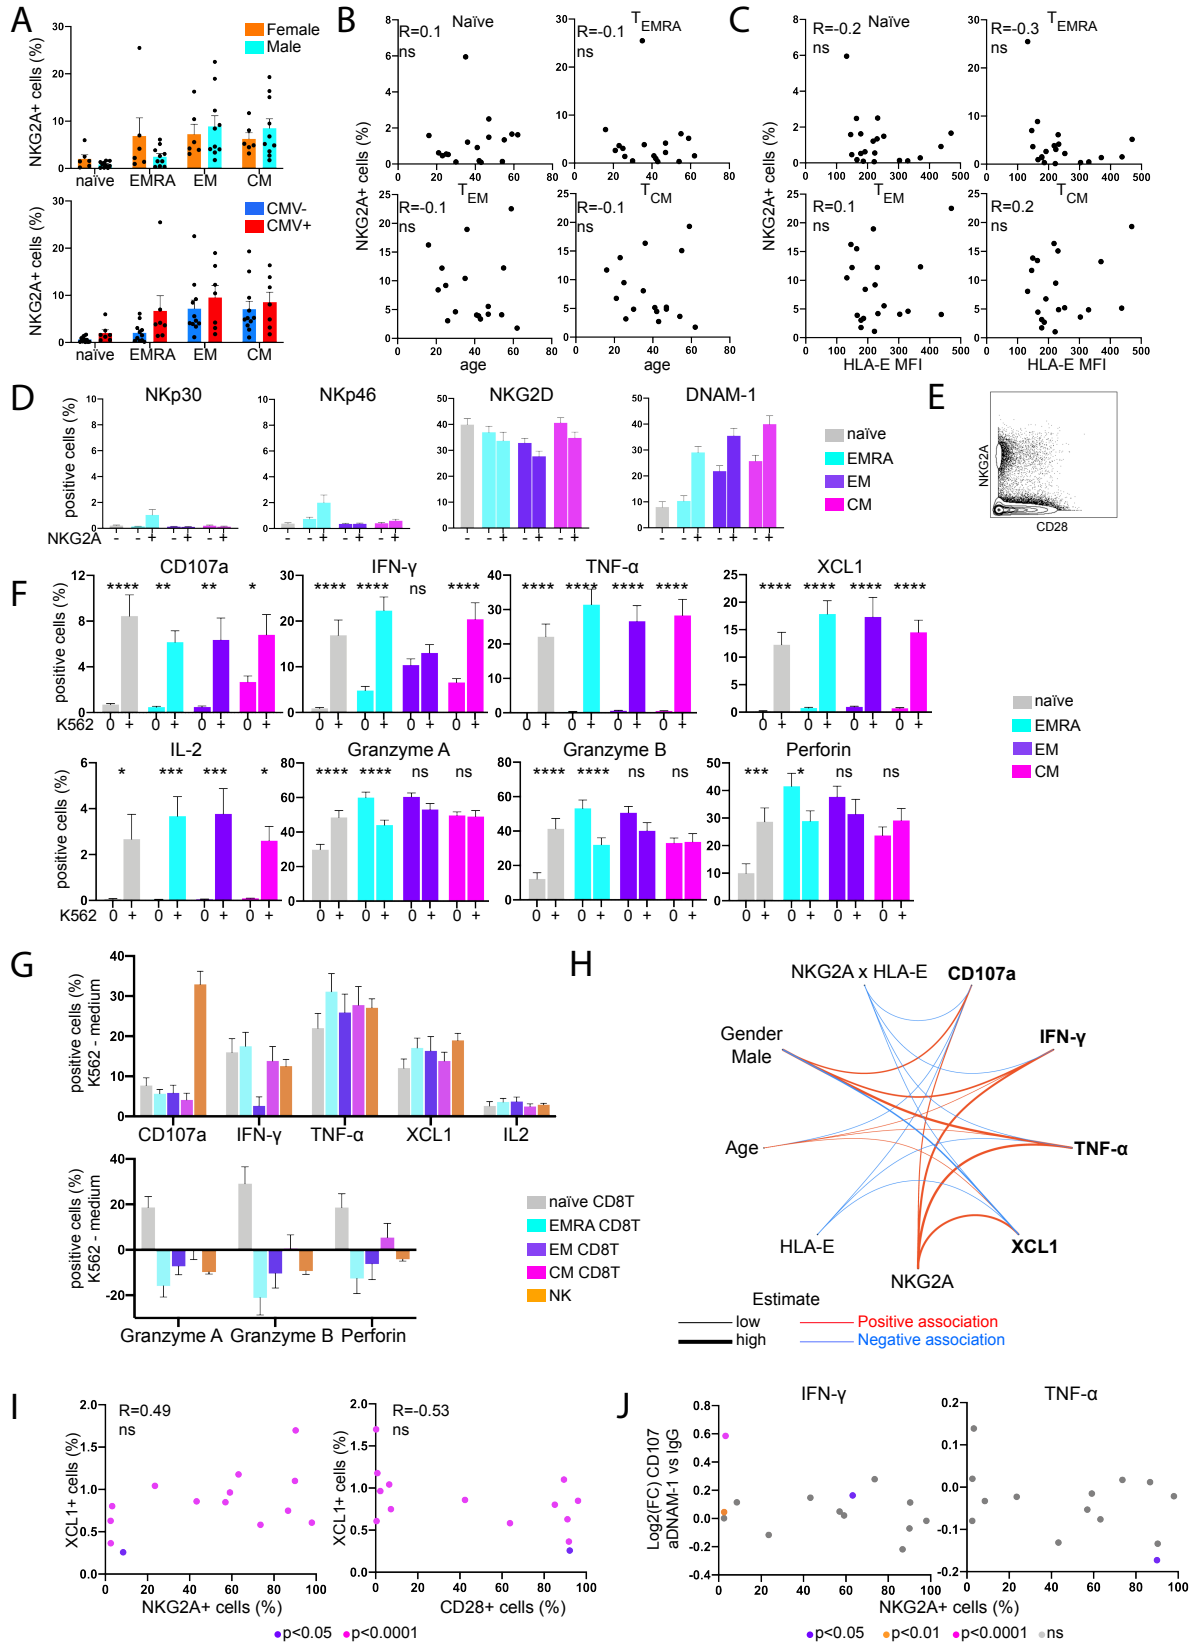





Figure S5. *KLRC1* (NKG2A) expression in CD8 T cells does not associate with a skewed clonal repertoire, Related to Figure 4.

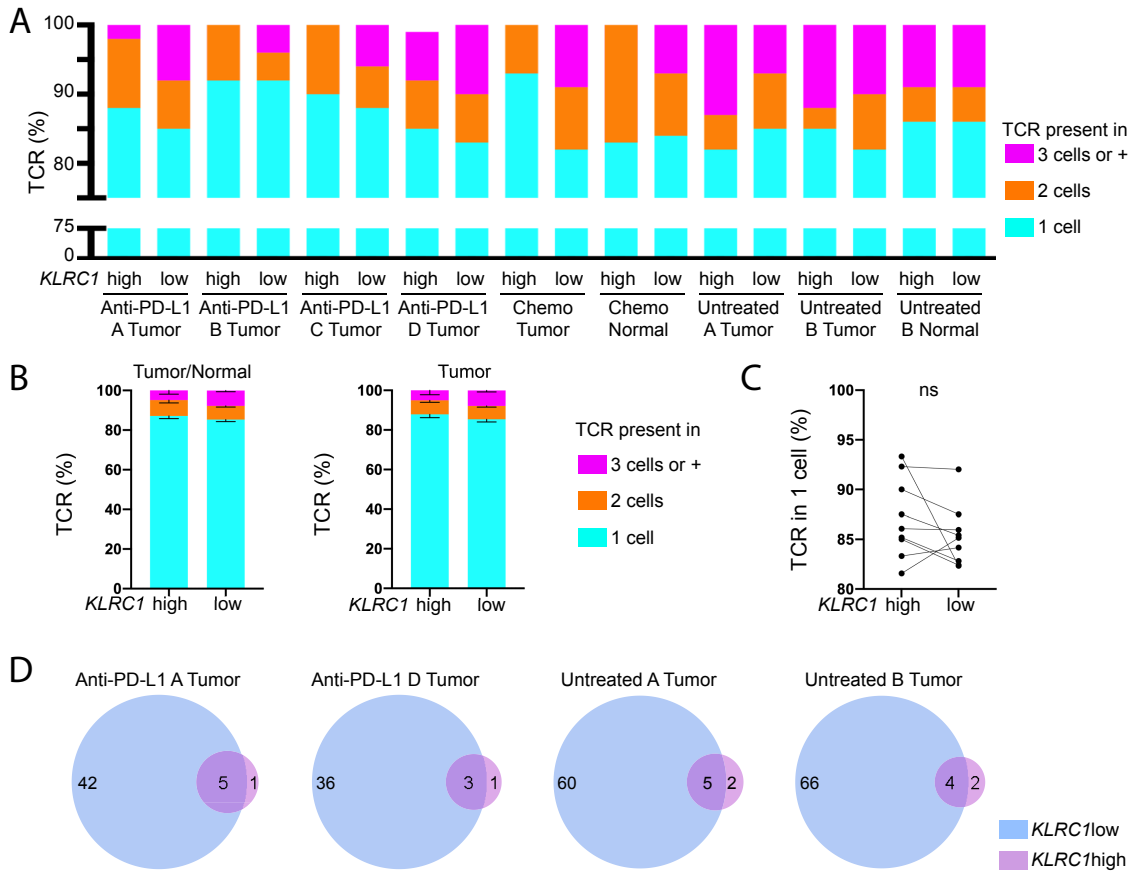

Figure S6. TCR-independent function is acquired by CD8 T cells upon NKG2A acquisition and is enhanced with NKG2A blockade in bladder cancer, Related to Figure 6

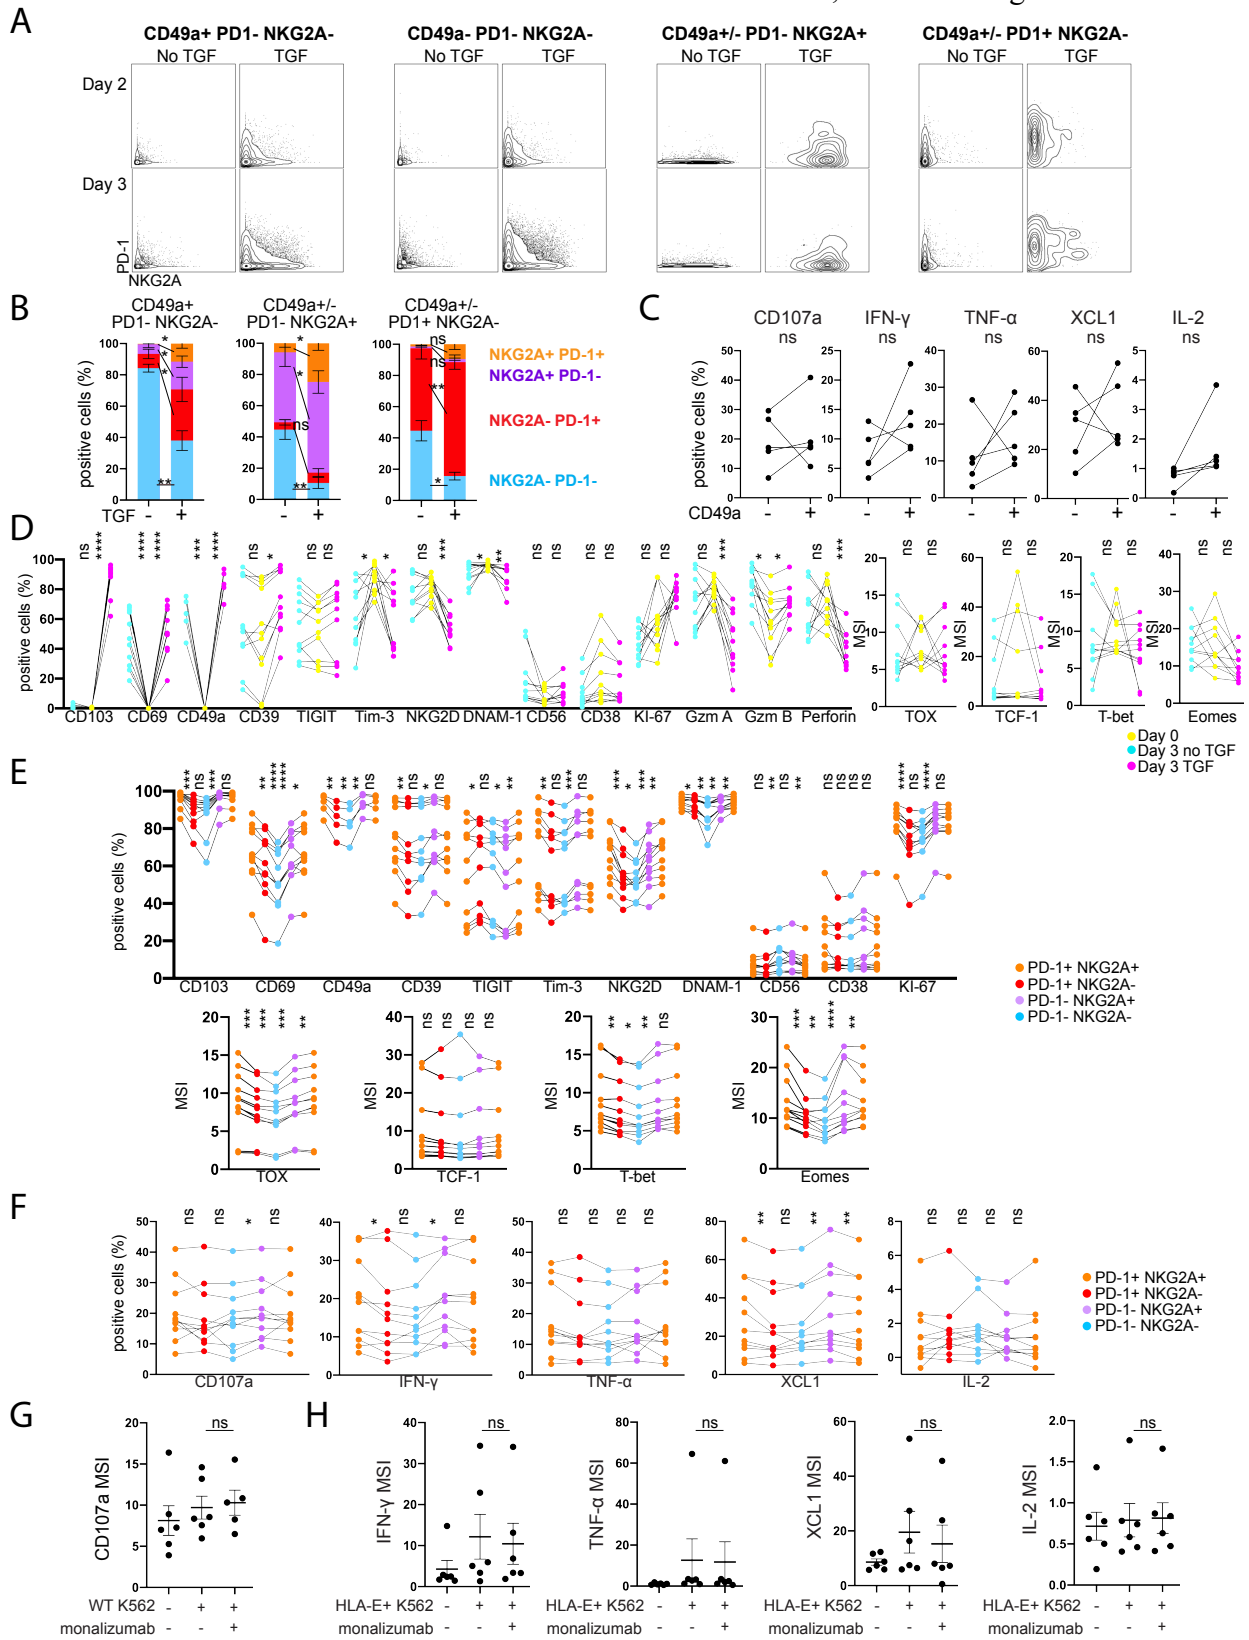

Supplement: NIHMS1830631-supplement-1.pdf [file NIHMS1830631-supplement-1.pdf]
